# Supplementary material for: Fitness Cost of Transgenic cry1Ab/c Rice Under Saline-Alkaline Soil Condition
Source: PubMed Central journal article supplement (PMC6206443; doi:10.3389/fpls.2018.01552), 2018-10-23
Supplement: Data_Sheet_1.pdf [file Data_Sheet_1.pdf]

## Supplementary information

**Table S1**

Three-way ANOVA analysis the effects of soil conditions, growth stages, tissues, and interactions among them on Cry1Ab/c protein expression in transgenic HH1 rice

|                                            | Cry1Ab/c protein ( $\mu\text{g g}^{-1}$ FW) |        |          |
|--------------------------------------------|---------------------------------------------|--------|----------|
|                                            | df                                          | F      | <i>P</i> |
| Soil                                       | 1                                           | 45.50  | 0.00     |
| Growth Stage                               | 4                                           | 36.46  | 0.00     |
| Tissue                                     | 1                                           | 332.14 | 0.00     |
| Soil $\times$ Growth Stage                 | 4                                           | 2.00   | NS       |
| Soil $\times$ Tissue                       | 1                                           | 5.66   | 0.02     |
| Growth Stage $\times$ Tissue               | 4                                           | 11.15  | 0.00     |
| Soil $\times$ Growth Stage $\times$ Tissue | 4                                           | 1.91   | NS       |

*p* < 0.05 indicates significant difference; NS indicates no significant difference

**Table S2**

Three-way ANOVA analysis the effects of soil conditions, rice lines and growth stages on vegetative growth indices

|         | Plant height (cm) |          |      | Tiller number |          |      | Biomass (g) |          |      |
|---------|-------------------|----------|------|---------------|----------|------|-------------|----------|------|
|         | df                | F        | P    | df            | F        | P    | df          | F        | P    |
| S       | 1                 | 3,560.86 | 0.00 | 1             | 3,057.84 | 0.00 | 1           | 2,019.01 | 0.00 |
| RI      | 1                 | 153.65   | 0.00 | 1             | 304.79   | 0.00 | 1           | 77.42    | 0.00 |
| Gs      | 3                 | 315.70   | 0.00 | 3             | 34.92    | 0.00 | 2           | 161.18   | 0.00 |
| S×RI    | 1                 | 13.46    | 0.00 | 1             | 116.25   | 0.00 | 1           | 21.61    | 0.00 |
| S ×Gs   | 3                 | 134.11   | 0.00 | 3             | 70.29    | 0.00 | 2           | 23.40    | 0.00 |
| RI×Gs   | 3                 | 11.51    | 0.00 | 3             | 8.82     | 0.00 | 2           | 0.57     | NS   |
| S×RI×Gs | 3                 | 1.10     | NS   | 3             | 11.99    | 0.00 | 2           | 3.87     | NS   |

S: Soils, RI: Rice lines, Gs: Growth stages.  $p < 0.05$  indicates significant difference; NS indicates no significant difference.

**Table S3**

Two-way ANOVA analysis the effects of soil conditions and rice lines on reproductive growth indices

| Reproductive traits            | Soil |          |          | Rice line |        |          | Soil × Rice line |        |          |
|--------------------------------|------|----------|----------|-----------|--------|----------|------------------|--------|----------|
|                                | df   | F        | <i>P</i> | df        | F      | <i>P</i> | df               | F      | <i>P</i> |
| Effective panicle number/plant | 1    | 648.00   | 0.00     | 1         | 32.00  | 0.00     | 1                | 32.00  | 0.00     |
| Panicle length (cm)            | 1    | 1,088.51 | 0.00     | 1         | 0.53   | NS       | 1                | 0.27   | NS       |
| Panicle weight (g)             | 1    | 4,044.05 | 0.00     | 1         | 22.50  | 0.00     | 1                | 8.10   | 0.00     |
| Filled grain number/plant      | 1    | 3,123.95 | 0.00     | 1         | 54.28  | 0.00     | 1                | 42.06  | 0.00     |
| Grain weight/plant (g)         | 1    | 2,722.35 | 0.00     | 1         | 22.87  | 0.00     | 1                | 18.50  | 0.00     |
| Grain number/plant             | 1    | 2,130.80 | 0.00     | 1         | 75.99  | 0.00     | 1                | 73.90  | 0.00     |
| Filled grain number/panicle    | 1    | 360.54   | 0.00     | 1         | 165.02 | 0.00     | 1                | 179.47 | 0.00     |
| Thousand grain weight (g)      | 1    | 79.49    | 0.00     | 1         | 0.37   | NS       | 1                | 0.05   | NS       |
| Seed-setting rate (%)          | 1    | 1,111.24 | 0.00     | 1         | 5.67   | 0.03     | 1                | 4.62   | 0.04     |

$p < 0.05$  indicates significant difference; NS indicates no significant difference
